# Supplementary material for: Characteristics of HPV integration in cervical adenocarcinoma and squamous carcinoma
Source: PubMed Central journal article supplement (PMC10725361; doi:10.1007/s00432-023-05494-4), 2023-11-15
Supplement: 432_2023_5494_MOESM1_ESM.pdf [file 432_2023_5494_MOESM1_ESM.pdf]

# Characteristics of HPV Integration in Cervical Adenocarcinoma and Squamous Carcinoma

Yuxin Bi <sup>1,2</sup>, Junbo Hu <sup>4</sup>, Ling Zeng <sup>1,5</sup>, Gang Chen <sup>3</sup>, Hongning Cai <sup>1,2</sup>, Huang Cao <sup>1,2,5</sup>, Quanfu Ma <sup>1,2</sup>, Xufeng Wu <sup>1,2</sup>

<sup>1</sup> Maternal and Child Health Hospital of Hubei Province, Huazhong University of Science and Technology, Wuhan, China;

<sup>2</sup> Hubei Clinical Medical Research Center for Gynecologic Malignancy, Wuhan, China;

<sup>3</sup> Department of Obstetrics and Gynecology, Tongji Hospital, Tongji Medical College, Huazhong University of Science and Technology, Wuhan, Hubei, China;

<sup>4</sup> Department of Pathology, Maternal and Child Health Hospital of Hubei Province, Huazhong University of Science and Technology, Wuhan, China;

<sup>5</sup> Medical Genetics Center of Hubei Province, Wuhan, China;

**Supplementary Table S1** Relationship between genomic elements features of integration sites and HPV type.

|         | HPV type | AC    |          |      |          |      |        | SCC   |          |      |                  |      |              |
|---------|----------|-------|----------|------|----------|------|--------|-------|----------|------|------------------|------|--------------|
|         |          | total | Negative |      | Positive |      | Pvalue | total | Negative |      | Positive         |      | Pvalue       |
|         |          |       | num      | %    | num      | %    |        |       | num      | %    | num              | %    |              |
|         | HPV16    | 96    | 24       | 25   | 72       | 75   |        | 571   | 292      | 51.1 | 279              | 48.9 |              |
| DHS     | HPV18    | 64    | 25       | 39.1 | 39       | 60.9 | 0.161  | 21    | 9        | 42.9 | 12               | 57.1 | 0.667        |
|         | others   | 9     | 3        | 33.3 | 6        | 66.7 |        | 93    | 50       | 53.8 | 43               | 46.2 |              |
|         | HPV16    | 96    | 79       | 82.3 | 17       | 17.7 |        | 571   | 526      | 92.1 | 45               | 7.9  |              |
| EnhS    | HPV18    | 64    | 56       | 87.5 | 8        | 12.5 | 0.722  | 21    | 18       | 85.7 | 3                | 14.3 | 0.446        |
|         | others   | 9     | 8        | 88.9 | 1        | 11.1 |        | 93    | 87       | 93.5 | 6                | 6.5  |              |
|         | HPV16    | 96    | 32       | 33.3 | 64       | 66.7 |        | 571   | 313      | 54.8 | 258 <sup>a</sup> | 45.2 |              |
| TFBS    | HPV18    | 64    | 30       | 46.9 | 34       | 53.1 | 0.204  | 21    | 7        | 33.3 | 14 <sup>a</sup>  | 66.7 | <b>0.002</b> |
|         | others   | 9     | 4        | 44.4 | 5        | 55.6 |        | 93    | 65       | 69.9 | 28 <sup>b</sup>  | 30.1 |              |
|         | HPV16    | 96    | 91       | 94.8 | 5        | 5.2  |        | 571   | 547      | 95.8 | 24               | 4.2  |              |
| Tss     | HPV18    | 64    | 62       | 96.9 | 2        | 3.1  | 0.443  | 21    | 21       | 100  | 0                | 0    | 0.087        |
|         | others   | 9     | 8        | 88.9 | 1        | 11.1 |        | 93    | 93       | 100  | 0                | 0    |              |
|         | HPV16    | 96    | 78       | 81.3 | 18       | 18.8 |        | 571   | 512      | 89.7 | 59               | 10.3 |              |
| H3K4me1 | HPV18    | 64    | 55       | 37.9 | 9        | 14.1 | 0.27   | 21    | 17       | 81   | 4                | 19   | 0.165        |
|         | others   | 9     | 6        | 66.7 | 3        | 33.3 |        | 93    | 87       | 93.5 | 6                | 6.5  |              |
|         | HPV16    | 96    | 83       | 86.5 | 13       | 13.5 |        | 571   | 534      | 93.5 | 37               | 6.5  |              |
| H3K4me2 | HPV18    | 64    | 59       | 92.2 | 5        | 7.8  | 0.499  | 21    | 20       | 95.2 | 1                | 4.8  | 0.268        |
|         | others   | 9     | 8        | 88.9 | 1        | 11.1 |        | 93    | 91       | 97.8 | 2                | 2.2  |              |
|         | HPV16    | 96    | 88       | 91.7 | 8        | 8.3  |        | 571   | 544      | 95.3 | 27               | 4.7  |              |
| H3K4me3 | HPV18    | 64    | 61       | 95.3 | 3        | 4.7  | 0.434  | 21    | 21       | 100  | 0                | 0    | 0.21         |
|         | others   | 9     | 8        | 88.9 | 1        | 11.1 |        | 93    | 92       | 98.9 | 1                | 1.1  |              |
